# Supplementary material
Source: Springer Nature journal article supplement (https://www.springermedizin.de/resource/supplementary/13002_2010_241_MOESM1_ESM.pdf/9627460)
Supplement: MOESM1 [file 9627460]

77°

78°

79°

80°

31°

30°

29°

28°

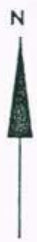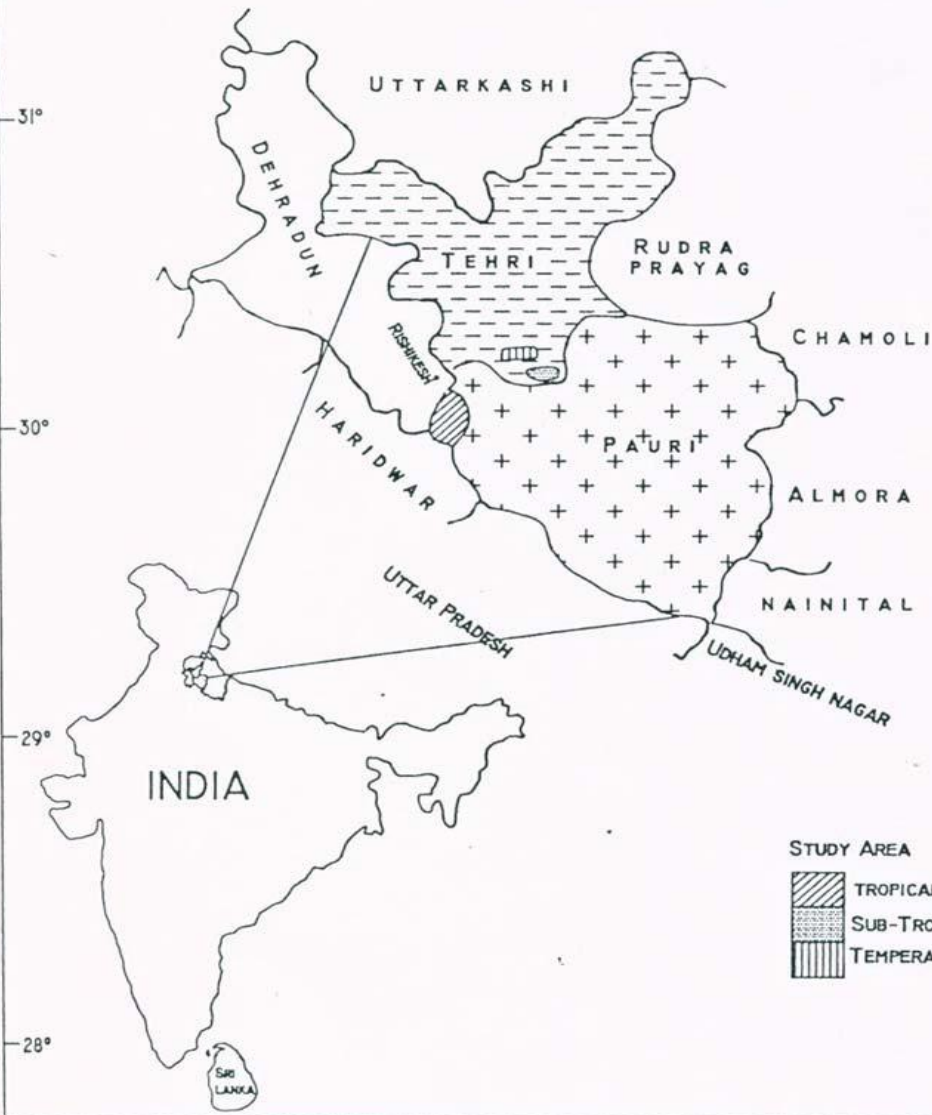

UTTARKASHI

DEHRADUN

TEHRI

RUDRA PRAYAG

CHAMOLI

RISHIKESH

HARIDWAR

PAURI

ALMORA

NAINITAL

UTTAR PRADESH

UDHAM SINGH NAGAR

INDIA

Sri LANKA

STUDY AREA

-  TROPICAL
-  SUB-TROPICAL
-  TEMPERATE

NOT TO SCALE
